# Supplementary material for: The angular structure of ONC201, a TRAIL pathway-inducing compound, determines its potent anti-cancer activity
Source: PubMed Central journal article supplement (PMC4350349; doi:10.18632/oncotarget.2890), 2015-01-13
Supplement: oncotarget-05-12728-s001.pdf [file oncotarget-05-12728-s001.pdf]

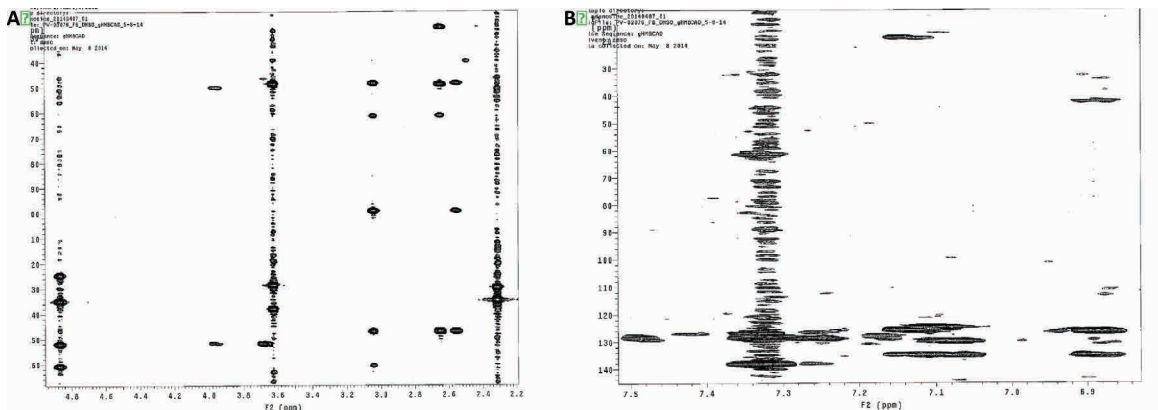

Supplementary Figure S3: (A) Upfield and (B) downfield region of 2D  $^1\text{H}$ - $^{13}\text{C}$  gHMBCAD spectrum of ONC201 in  $d_6$ -DMSO.

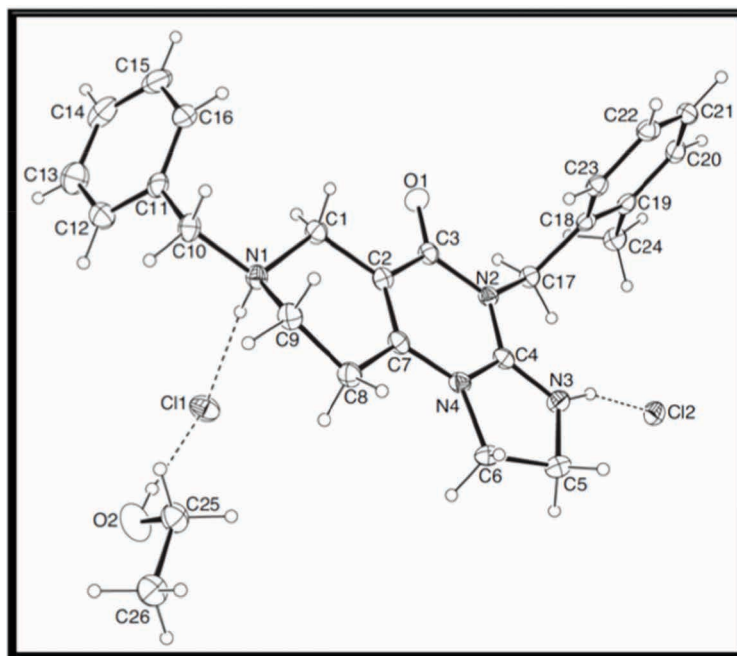

Supplementary Figure S4: ORTEP drawing of ONC201 dihydrochloride structure with 50% probability thermal ellipsoids.

**Supplementary Table S1: Summary of X-Ray Structure determination of ONC201 dihydrochloride structure.**

|                                   |                                             |
|-----------------------------------|---------------------------------------------|
| Empirical formula                 | $C_{26}H_{34}N_4O_2Cl_2$                    |
| Formula weight                    | 505.47                                      |
| Temperature                       | 100(1) K                                    |
| Wavelength                        | 0.71073 Å                                   |
| Crystal system                    | monoclinic                                  |
| Space group                       | $P2_1/c$                                    |
| Cell constants:                   |                                             |
| a                                 | 11.7746(3) Å                                |
| b                                 | 10.3998(2) Å                                |
| c                                 | 21.9517(5) Å                                |
| $\beta$                           | 95.1950(10)°                                |
| Volume                            | 2677.02(10) Å <sup>3</sup>                  |
| Z                                 | 4                                           |
| Density (calculated)              | 1.254 Mg/m <sup>3</sup>                     |
| Absorption coefficient            | 0.272 mm <sup>-1</sup>                      |
| F(000)                            | 1072                                        |
| Crystal size                      | 0.32 x 0.24 x 0.06 mm <sup>3</sup>          |
| Theta range for data collection   | 1.74 to 25.40°                              |
| Index ranges                      | -14 ≤ h ≤ 14, -12 ≤ k ≤ 12, -26 ≤ l ≤ 26    |
| Reflections collected             | 36379                                       |
| Independent reflections           | 4928 [R(int) = 0.0151]                      |
| Completeness to theta = 25.40°    | 99.9 %                                      |
| Absorption correction             | Semi-empirical from equivalents             |
| Max. and min. transmission        | 0.7452 and 0.6888                           |
| Refinement method                 | Full-matrix least-squares on F <sup>2</sup> |
| Data / restraints / parameters    | 4928 / 0 / 311                              |
| Goodness-of-fit on F <sup>2</sup> | 1.066                                       |
| Final R indices [I > 2σ(I)]       | R1 = 0.0289, wR2 = 0.0772                   |
| R indices (all data)              | R1 = 0.0302, wR2 = 0.0779                   |
| Largest diff. peak and hole       | 0.304 and -0.246 e.Å <sup>-3</sup>          |

Supplementary Table S2: Refined positional parameters for ONC201 dihydrochloride structure, excluding hydrogens.

| Atom | x            | y           | z            | $U_{eq}, \text{\AA}^2$ |
|------|--------------|-------------|--------------|------------------------|
| C1   | 0.24400(11)  | 0.95070(12) | 0.14757(5)   | 0.0172(3)              |
| C2   | 0.28090(10)  | 0.82303(12) | 0.17399(5)   | 0.0157(2)              |
| C3   | 0.32697(10)  | 0.73340(12) | 0.13249(5)   | 0.0157(2)              |
| C4   | 0.34884(10)  | 0.58406(12) | 0.21644(5)   | 0.0155(2)              |
| C5   | 0.35291(12)  | 0.48312(13) | 0.30893(6)   | 0.0218(3)              |
| C6   | 0.29742(11)  | 0.61564(13) | 0.31441(6)   | 0.0210(3)              |
| C7   | 0.27053(10)  | 0.79035(12) | 0.23279(6)   | 0.0160(2)              |
| C8   | 0.22097(11)  | 0.87906(12) | 0.27691(6)   | 0.0188(3)              |
| C9   | 0.20800(11)  | 1.01479(12) | 0.25157(5)   | 0.0185(3)              |
| C10  | 0.13315(11)  | 1.14974(12) | 0.16495(6)   | 0.0203(3)              |
| C11  | 0.08993(11)  | 1.15801(12) | 0.09839(6)   | 0.0187(3)              |
| C12  | -0.02590(12) | 1.15066(14) | 0.08038(6)   | 0.0251(3)              |
| C13  | -0.06626(13) | 1.15985(15) | 0.01895(7)   | 0.0309(3)              |
| C14  | 0.01002(14)  | 1.17297(14) | -0.02461(7)  | 0.0314(3)              |
| C15  | 0.12501(14)  | 1.17927(14) | -0.00740(7)  | 0.0321(3)              |
| C16  | 0.16528(12)  | 1.17367(13) | 0.05378(7)   | 0.0255(3)              |
| C17  | 0.39945(10)  | 0.51418(11) | 0.11605(5)   | 0.0152(2)              |
| C18  | 0.52420(10)  | 0.52407(12) | 0.10534(5)   | 0.0145(2)              |
| C19  | 0.56764(10)  | 0.42974(12) | 0.06780(5)   | 0.0160(2)              |
| C20  | 0.68077(11)  | 0.43991(13) | 0.05460(5)   | 0.0188(3)              |
| C21  | 0.74934(11)  | 0.54095(13) | 0.07701(6)   | 0.0207(3)              |
| C22  | 0.70618(11)  | 0.63290(13) | 0.11435(6)   | 0.0189(3)              |
| C23  | 0.59365(10)  | 0.62345(12) | 0.12861(5)   | 0.0163(2)              |
| C24  | 0.49394(11)  | 0.32199(12) | 0.04178(6)   | 0.0197(3)              |
| N1   | 0.16108(9)   | 1.01341(10) | 0.18576(5)   | 0.0168(2)              |
| N2   | 0.36042(8)   | 0.61299(10) | 0.15739(5)   | 0.0148(2)              |
| N3   | 0.37882(9)   | 0.47786(10) | 0.24497(5)   | 0.0179(2)              |
| N4   | 0.30281(9)   | 0.67061(10) | 0.25284(4)   | 0.0159(2)              |
| O1   | 0.33734(8)   | 0.75527(9)  | 0.07856(4)   | 0.01955(19)            |
| Cl1  | -0.05749(3)  | 0.85901(3)  | 0.195197(14) | 0.02505(9)             |
| Cl2  | 0.43555(3)   | 0.21186(3)  | 0.199098(14) | 0.02173(9)             |
| C25  | -0.04631(11) | 1.00244(14) | 0.35857(6)   | 0.0247(3)              |
| C26  | -0.08679(12) | 1.02224(14) | 0.42091(6)   | 0.0254(3)              |
| O2   | -0.14117(8)  | 0.96661(12) | 0.31771(5)   | 0.0333(3)              |

$U_{eq} = 1/3[U_{11}(aa^*)^2 + U_{22}(bb^*)^2 + U_{33}(cc^*)^2 + 2U_{12}aa^*bb^*\cos\gamma + 2U_{13}aa^*cc^*\cos\beta + 2U_{23}bb^*cc^*\cos\alpha]$

Supplementary Table S3: Positional Parameters for ONC201 dihydrochloride hydrogens in structure.

| Atom | x       | y      | z       | $U_{iso}, \text{\AA}^2$ |
|------|---------|--------|---------|-------------------------|
| H1a  | 0.3101  | 1.0057 | 0.1457  | 0.023                   |
| H1b  | 0.2088  | 0.9389 | 0.1063  | 0.023                   |
| H5a  | 0.4219  | 0.4759 | 0.3364  | 0.029                   |
| H5b  | 0.3008  | 0.4149 | 0.3179  | 0.029                   |
| H6a  | 0.2192  | 0.6077 | 0.3244  | 0.028                   |
| H6b  | 0.3398  | 0.6678 | 0.3453  | 0.028                   |
| H8a  | 0.2700  | 0.8807 | 0.3149  | 0.025                   |
| H8b  | 0.1469  | 0.8470 | 0.2859  | 0.025                   |
| H9a  | 0.1572  | 1.0633 | 0.2754  | 0.025                   |
| H9b  | 0.2817  | 1.0572 | 0.2552  | 0.025                   |
| H10a | 0.0759  | 1.1846 | 0.1894  | 0.027                   |
| H10b | 0.2011  | 1.2023 | 0.1721  | 0.027                   |
| H12  | -0.0772 | 1.1395 | 0.1097  | 0.033                   |
| H13  | -0.1442 | 1.1571 | 0.0074  | 0.041                   |
| H14  | -0.0163 | 1.1776 | -0.0658 | 0.042                   |
| H15  | 0.1762  | 1.1874 | -0.0371 | 0.043                   |
| H16  | 0.2431  | 1.1804 | 0.0651  | 0.034                   |
| H17a | 0.3543  | 0.5206 | 0.0770  | 0.020                   |
| H17b | 0.3856  | 0.4301 | 0.1330  | 0.020                   |
| H20  | 0.7110  | 0.3777 | 0.0303  | 0.025                   |
| H21  | 0.8242  | 0.5469 | 0.0670  | 0.027                   |
| H22  | 0.7520  | 0.7004 | 0.1298  | 0.025                   |
| H23  | 0.5647  | 0.6845 | 0.1540  | 0.022                   |
| H24a | 0.5356  | 0.2717 | 0.0147  | 0.030                   |
| H24b | 0.4269  | 0.3567 | 0.0196  | 0.030                   |
| H24c | 0.4721  | 0.2685 | 0.0744  | 0.030                   |
| H1   | 0.0955  | 0.9667 | 0.1825  | 0.022                   |
| H3   | 0.4097  | 0.4132 | 0.2284  | 0.024                   |
| H25a | -0.0128 | 1.0812 | 0.3447  | 0.033                   |
| H25b | 0.0112  | 0.9355 | 0.3602  | 0.033                   |
| H26a | -0.1420 | 1.0903 | 0.4191  | 0.038                   |
| H26b | -0.0232 | 1.0446 | 0.4494  | 0.038                   |
| H26c | -0.1210 | 0.9444 | 0.4340  | 0.038                   |
| H2   | -0.1190 | 0.9448 | 0.2849  | 0.050                   |



Supplementary Table S4: Refined Thermal Parameters (U's) for ONC201 dihydrochloride structure.

| Atom | U <sub>11</sub> | U <sub>22</sub> | U <sub>33</sub> | U <sub>23</sub> | U <sub>13</sub> | U <sub>12</sub> |
|------|-----------------|-----------------|-----------------|-----------------|-----------------|-----------------|
| C1   | 0.0196(6)       | 0.0169(6)       | 0.0155(6)       | -0.0019(5)      | 0.0037(5)       | 0.0029(5)       |
| C2   | 0.0144(6)       | 0.0165(6)       | 0.0163(6)       | -0.0020(5)      | 0.0010(4)       | 0.0008(5)       |
| C3   | 0.0141(6)       | 0.0157(6)       | 0.0175(6)       | -0.0009(5)      | 0.0015(4)       | -0.0003(5)      |
| C4   | 0.0116(5)       | 0.0178(6)       | 0.0170(6)       | -0.0012(5)      | 0.0013(4)       | -0.0022(5)      |
| C5   | 0.0249(7)       | 0.0228(7)       | 0.0181(6)       | 0.0047(5)       | 0.0033(5)       | 0.0000(5)       |
| C6   | 0.0237(6)       | 0.0252(7)       | 0.0148(6)       | 0.0040(5)       | 0.0059(5)       | 0.0011(5)       |
| C7   | 0.0119(5)       | 0.0191(6)       | 0.0167(6)       | -0.0024(5)      | 0.0004(4)       | -0.0009(5)      |
| C8   | 0.0197(6)       | 0.0216(6)       | 0.0154(6)       | -0.0020(5)      | 0.0029(5)       | 0.0023(5)       |
| C9   | 0.0202(6)       | 0.0206(6)       | 0.0147(6)       | -0.0046(5)      | 0.0014(5)       | 0.0020(5)       |
| C10  | 0.0222(6)       | 0.0150(6)       | 0.0237(7)       | -0.0026(5)      | 0.0015(5)       | 0.0039(5)       |
| C11  | 0.0227(6)       | 0.0118(6)       | 0.0218(6)       | -0.0003(5)      | 0.0032(5)       | 0.0036(5)       |
| C12  | 0.0240(7)       | 0.0279(7)       | 0.0239(7)       | 0.0011(6)       | 0.0046(5)       | 0.0032(6)       |
| C13  | 0.0311(8)       | 0.0313(8)       | 0.0290(8)       | -0.0002(6)      | -0.0040(6)      | 0.0028(6)       |
| C14  | 0.0528(10)      | 0.0204(7)       | 0.0204(7)       | 0.0021(5)       | 0.0004(6)       | 0.0060(7)       |
| C15  | 0.0491(9)       | 0.0207(7)       | 0.0293(7)       | 0.0074(6)       | 0.0184(7)       | 0.0058(7)       |
| C16  | 0.0268(7)       | 0.0177(6)       | 0.0332(8)       | 0.0060(6)       | 0.0100(6)       | 0.0017(5)       |
| C17  | 0.0175(6)       | 0.0128(6)       | 0.0154(6)       | -0.0023(4)      | 0.0022(5)       | 0.0009(5)       |
| C18  | 0.0165(6)       | 0.0151(6)       | 0.0120(5)       | 0.0027(4)       | 0.0015(4)       | 0.0019(5)       |
| C19  | 0.0206(6)       | 0.0156(6)       | 0.0117(5)       | 0.0026(5)       | 0.0007(5)       | 0.0030(5)       |
| C20  | 0.0213(6)       | 0.0213(6)       | 0.0140(6)       | 0.0017(5)       | 0.0037(5)       | 0.0077(5)       |
| C21  | 0.0152(6)       | 0.0291(7)       | 0.0179(6)       | 0.0065(5)       | 0.0025(5)       | 0.0021(5)       |
| C22  | 0.0188(6)       | 0.0222(6)       | 0.0154(6)       | 0.0033(5)       | -0.0007(5)      | -0.0038(5)      |
| C23  | 0.0201(6)       | 0.0157(6)       | 0.0130(6)       | 0.0002(5)       | 0.0017(5)       | 0.0013(5)       |
| C24  | 0.0255(7)       | 0.0152(6)       | 0.0187(6)       | -0.0025(5)      | 0.0045(5)       | 0.0023(5)       |
| N1   | 0.0176(5)       | 0.0159(5)       | 0.0168(5)       | -0.0020(4)      | 0.0018(4)       | 0.0019(4)       |
| N2   | 0.0152(5)       | 0.0148(5)       | 0.0149(5)       | -0.0009(4)      | 0.0035(4)       | 0.0009(4)       |
| N3   | 0.0203(5)       | 0.0164(5)       | 0.0171(5)       | 0.0011(4)       | 0.0019(4)       | 0.0008(4)       |
| N4   | 0.0158(5)       | 0.0192(5)       | 0.0132(5)       | 0.0001(4)       | 0.0029(4)       | 0.0010(4)       |
| O1   | 0.0266(5)       | 0.0181(4)       | 0.0146(4)       | -0.0001(3)      | 0.0050(4)       | 0.0035(4)       |
| Cl1  | 0.02173(17)     | 0.03089(19)     | 0.02277(17)     | -0.00372(13)    | 0.00328(12)     | -0.00604(13)    |
| Cl2  | 0.02096(16)     | 0.01701(16)     | 0.02741(17)     | 0.00375(12)     | 0.00331(12)     | 0.00240(11)     |
| C25  | 0.0196(6)       | 0.0284(7)       | 0.0258(7)       | -0.0009(6)      | 0.0000(5)       | -0.0004(6)      |
| C26  | 0.0224(7)       | 0.0270(7)       | 0.0264(7)       | -0.0020(6)      | 0.0005(5)       | -0.0024(6)      |
| O2   | 0.0235(5)       | 0.0482(7)       | 0.0273(5)       | -0.0119(5)      | -0.0028(4)      | 0.0054(5)       |

The form of the anisotropic displacement parameter is:  
 $\exp[-2\pi(a^2U_{11}h^2+b^2U_{22}k^2+c^2U_{33}l^2+2b^*c^*U_{23}kl+2a^*c^*U_{13}hl+2a^*b^*U_{12}hk)]$

**Supplementary Table S5: Bond distances in ONC201 dihydrochloride structure.**

|         |            |         |            |         |            |
|---------|------------|---------|------------|---------|------------|
| C1-N1   | 1.4932(15) | C1-C2   | 1.4975(17) | C2-C7   | 1.3510(17) |
| C2-C3   | 1.4431(17) | C3-O1   | 1.2224(15) | C3-N2   | 1.4082(16) |
| C4-N3   | 1.3026(16) | C4-N4   | 1.3494(16) | C4-N2   | 1.3496(16) |
| C5-N3   | 1.4645(16) | C5-C6   | 1.5346(19) | C6-N4   | 1.4741(15) |
| C7-N4   | 1.3633(16) | C7-C8   | 1.4939(17) | C8-C9   | 1.5198(18) |
| C9-N1   | 1.4994(15) | C10-C11 | 1.5056(18) | C10-N1  | 1.5165(16) |
| C11-C12 | 1.3872(19) | C11-C16 | 1.3892(18) | C12-C13 | 1.392(2)   |
| C13-C14 | 1.377(2)   | C14-C15 | 1.374(2)   | C15-C16 | 1.384(2)   |
| C17-N2  | 1.4718(15) | C17-C18 | 1.5120(16) | C18-C23 | 1.3864(17) |
| C18-C19 | 1.4068(17) | C19-C20 | 1.3926(18) | C19-C24 | 1.4984(17) |
| C20-C21 | 1.3878(19) | C21-C22 | 1.3856(19) | C22-C23 | 1.3924(18) |
| C25-O2  | 1.4175(16) | C25-C26 | 1.5035(19) |         |            |

**Supplementary Table S6: Bond angles in ONC201 dihydrochloride structure.**

|             |            |             |            |             |            |
|-------------|------------|-------------|------------|-------------|------------|
| N1-C1-C2    | 110.57(10) | C7-C2-C3    | 120.82(11) | C7-C2-C1    | 123.02(11) |
| C3-C2-C1    | 116.14(10) | O1-C3-N2    | 119.50(11) | O1-C3-C2    | 124.57(11) |
| N2-C3-C2    | 115.93(10) | N3-C4-N4    | 112.75(11) | N3-C4-N2    | 127.18(11) |
| N4-C4-N2    | 120.07(11) | N3-C5-C6    | 103.64(10) | N4-C6-C5    | 102.85(10) |
| C2-C7-N4    | 119.44(11) | C2-C7-C8    | 122.58(11) | N4-C7-C8    | 117.95(11) |
| C7-C8-C9    | 111.62(10) | N1-C9-C8    | 111.09(10) | C11-C10-N1  | 113.00(10) |
| C12-C11-C16 | 118.67(12) | C12-C11-C10 | 120.70(12) | C16-C11-C10 | 120.62(12) |
| C11-C12-C13 | 120.85(13) | C14-C13-C12 | 119.52(14) | C15-C14-C13 | 120.17(14) |
| C14-C15-C16 | 120.48(13) | C15-C16-C11 | 120.28(14) | N2-C17-C18  | 114.23(10) |
| C23-C18-C19 | 120.14(11) | C23-C18-C17 | 122.84(11) | C19-C18-C17 | 116.97(11) |
| C20-C19-C18 | 118.31(11) | C20-C19-C24 | 120.61(11) | C18-C19-C24 | 121.07(11) |
| C21-C20-C19 | 121.36(12) | C22-C21-C20 | 119.97(12) | C21-C22-C23 | 119.45(12) |
| C18-C23-C22 | 120.75(11) | C1-N1-C9    | 110.03(9)  | C1-N1-C10   | 111.98(10) |
| C9-N1-C10   | 109.40(9)  | C4-N2-C3    | 121.47(10) | C4-N2-C17   | 120.06(10) |
| C3-N2-C17   | 118.27(10) | C4-N3-C5    | 111.00(10) | C4-N4-C7    | 122.23(10) |
| C4-N4-C6    | 109.70(10) | C7-N4-C6    | 128.05(10) | O2-C25-C26  | 108.38(11) |
